# Supplementary material for: Iron and Folic Acid Supplementation in Pregnancy: Findings from the Baseline Assessment of a Maternal Nutrition Service Programme in Bangladesh
Source: MDPI journal article supplement (doi:10.3390/nu14153114), 2022-07-28
Supplement: s1 [file s1]

**Table S1: Factor associated with the number of IFA supplements received**

| Variables                                                             | N(weighted) | Number of IFA received      |                                      |
|-----------------------------------------------------------------------|-------------|-----------------------------|--------------------------------------|
|                                                                       |             | Mean difference<br>(95% CI) | Adjusted mean<br>difference (95% CI) |
| Region/area                                                           |             |                             |                                      |
| North (kurigram)                                                      | 762         | Ref                         | Ref                                  |
| South (Bhola)                                                         | 1810        | -11.7(-20.1, -3.9)          | 7.3(1.5, 13.0)                       |
| Mother's age                                                          |             |                             |                                      |
| <20                                                                   | 462         | Ref                         | Ref                                  |
| 20-29                                                                 | 1409        | -3.3(-11.5, 5.0)            | 1.8(-5.1, 8.6)                       |
| 30 or more                                                            | 701         | -16.7(-25.3, -8.1)          | -1.5(-9.5, 6.6)                      |
| Mother's education                                                    |             |                             |                                      |
| Up to primary                                                         | 1031        | Ref                         | Ref                                  |
| Secondary                                                             | 1201        | 20.1(14.2, 26.1)            | 4.1(-1.3, 9.6)                       |
| Higher secondary and above                                            | 340         | 54.5(44.3, 64.7)            | 25.6(17.3, 33.9)                     |
| Religion                                                              |             |                             |                                      |
| Muslim                                                                | 2485        | Ref                         | Ref                                  |
| Others                                                                | 87          | 18.4(2.0, 34.8)             | 7.9(-5.8, 21.6)                      |
| Work involvement                                                      |             |                             |                                      |
| Not employed                                                          | 2507        | Ref                         | Ref                                  |
| Employed                                                              | 65          | 12.0(-5.3, 29.4)            | 7.2(-7.3, 21.7)                      |
| Household Wealth (tertile)                                            |             |                             |                                      |
| Poor                                                                  | 794         | Ref                         | Ref                                  |
| Middle                                                                | 854         | 3.9(-3.9, 11.7)             | 1.9(-4.2, 8.1)                       |
| Rich                                                                  | 925         | 23.8(16.0-31.5)             | 3.6(-3.6, 10.8)                      |
| Mother's exposure to print or electronic media (at least once a week) |             |                             |                                      |
| No                                                                    | 1905        | Ref                         | Ref                                  |
| Yes                                                                   | 667         | 17.4(10.4, 24.5)            | 5.1(-0.9, 11.1)                      |
| Birth order of the last child                                         |             |                             |                                      |
| 1                                                                     | 955         | Ref                         | Ref                                  |
| 2                                                                     | 793         | -13.9(-21.5, -6.2)          | -5.8(-12.0, 0.3)                     |
| ≥3                                                                    | 825         | -27.7(-34.7, -20.6)         | -5.6(-13.1, 1.8)                     |
| Any history of abortion/stillbirth before this pregnancy              |             |                             |                                      |
| No                                                                    | 2235        | Ref                         | *                                    |
| Yes                                                                   | 337         | 2.3 (-6.3, 10.8)            | *                                    |
| Women who had pregnancy complications                                 |             |                             |                                      |
| No                                                                    | 1948        | Ref                         | Ref                                  |
| Yes                                                                   | 624         | 9.3(0.9, 17.7)              | -5.5(-11.0, 0.3)                     |

| Variables                                                                                      | N(weighted) | Number of IFA received |                             |
|------------------------------------------------------------------------------------------------|-------------|------------------------|-----------------------------|
|                                                                                                |             | 2572                   | Mean difference<br>(95% CI) |
| Number of ANC and timing of first ANC                                                          |             |                        |                             |
| Number of ANC visits among mothers who received none/ started late (≥5 months GA) <sup>a</sup> | 1818        | 13.4(11.6, 15.2)       | 11.1(9.1, 13.2)             |
| Number of ANC visits among mothers who started early (≤4 months GA) <sup>a</sup>               | 754         | 15.8(12.8, 18.8)       | 15.3(12.6, 18.0)            |
| Received advice on IFA                                                                         |             |                        |                             |
| No                                                                                             | 1232        | Ref                    | Ref                         |
| Yes                                                                                            | 1340        | 44.2(37.8, 50.7)       | 31.8(24.6, 39.0)            |
| Received IFA free                                                                              |             |                        |                             |
| No                                                                                             | 1498        | Ref                    | Ref                         |
| Yes                                                                                            | 1074        | 36.6(30.7, 42.5)       | 21.2(16.2, 26.2)            |
| Received IFA only from ANC contacts                                                            |             |                        |                             |
| No                                                                                             | 1616        | Ref                    | Ref                         |
| Yes                                                                                            | 956         | 11.3(5.6, 16.9)        | -37.6(-43.5, -31.6)         |

IFA – iron and folic acid, ANC – antenatal care, GA – gestational age, \* variables not included in the adjusted model

**Table S2: Factor associated with user adherence-adjusted effective coverage (consumed 180+ tablets) during pregnancy**

| Variables                                                                    | N(weighted)<br>2572 | Women consumed 180+ tablets<br>Risk Ratio | Adjusted Risk<br>Ratio |
|------------------------------------------------------------------------------|---------------------|-------------------------------------------|------------------------|
| <b>Region/area</b>                                                           |                     |                                           |                        |
| North (kurigram)                                                             | 762                 | Ref                                       | Ref                    |
| South (Bhola)                                                                | 1810                | 0.49(0.35-0.69)                           | 0.65(0.48-0.88)        |
| <b>Mother's age</b>                                                          |                     |                                           |                        |
| <20                                                                          | 462                 | Ref                                       |                        |
| 20-29                                                                        | 1409                | 1.34(0.83-2.17)                           | *                      |
| 30 or more                                                                   | 701                 | 1.00(0.60-1.65)                           | *                      |
| <b>Mother's education</b>                                                    |                     |                                           |                        |
| Up to primary                                                                | 1031                | Ref                                       | Ref                    |
| Secondary                                                                    | 1201                | 1.67(1.15-2.44)                           | 1.21(0.80-1.81)        |
| Higher secondary and above                                                   | 340                 | 4.21(2.74-6.48)                           | 2.2(1.29-3.82)         |
| <b>Religion</b>                                                              |                     |                                           |                        |
| Muslim                                                                       | 2485                | Ref                                       | *                      |
| Others                                                                       | 87                  | 1.39(0.68-2.85)                           | *                      |
| <b>Work involvement</b>                                                      |                     |                                           |                        |
| Not employed                                                                 | 2507                | Ref                                       | *                      |
| Employed                                                                     | 65                  | 1.54(0.74-3.19)                           | *                      |
| <b>Household Wealth (tertile)</b>                                            |                     |                                           |                        |
| Poor                                                                         | 794                 | Ref                                       | Ref                    |
| Middle                                                                       | 854                 | 0.94(0.58-1.51)                           | 0.90(0.58-1.41)        |
| Rich                                                                         | 925                 | 1.76(1.22-2.56)                           | 0.97(0.63-1.51)        |
| <b>Mother's exposure to print or electronic media (at least once a week)</b> |                     |                                           |                        |
| No                                                                           | 1905                | Ref                                       | Ref                    |
| yes                                                                          | 667                 | 1.84(1.38-2.45)                           | 1.21(0.88-1.65)        |
| <b>Birth order of the last child</b>                                         |                     |                                           |                        |
| 1                                                                            | 955                 | Ref                                       | Ref                    |
| 2                                                                            | 793                 | 1.03(0.73-1.45)                           | 1.09(0.80-1.48)        |
| ≥3                                                                           | 825                 | 0.55(0.34-0.73)                           | 0.89(0.56-1.41)        |
| <b>Any history of abortion/stillbirth before this pregnancy</b>              |                     |                                           |                        |
| No                                                                           | 2235                | Ref                                       | *                      |
| Yes                                                                          | 337                 | 1.10 (0.69-1.77)                          | *                      |
| <b>Women who had pregnancy complications</b>                                 |                     |                                           |                        |
| No                                                                           | 1948                | Ref                                       | *                      |
| Yes                                                                          | 624                 | 0.82(0.54-1.24)                           | *                      |
| <b>Number of ANC and timing of first ANC</b>                                 |                     |                                           |                        |

| Variables                                                                                  | N(weighted)<br>2572 | Women consumed 180+ tablets |                     |
|--------------------------------------------------------------------------------------------|---------------------|-----------------------------|---------------------|
|                                                                                            |                     | Risk Ratio                  | Adjusted Risk Ratio |
| Number of ANC visits among mothers who received none or started late ( $\geq 5$ months GA) | 1818                | 1.11(0.94, 1.31)            | 1.24(0.94, 1.34)    |
| Number of ANC visits among mothers who started early ( $\leq 4$ months GA)                 | 754                 | 1.49(1.33, 1.65)            | 1.46(1.32, 1.62)    |
| <b>Received advice on IFA</b>                                                              |                     |                             |                     |
| No                                                                                         | 1232                | Ref                         | Ref                 |
| Yes                                                                                        | 1340                | 1.68(1.18-2.38)             | 1.52(1.03, 2.23)    |
| <b>Received IFA free</b>                                                                   |                     |                             |                     |
| No                                                                                         | 1498                | Ref                         | Ref                 |
| Yes                                                                                        | 1074                | 1.29(0.92-1.81)             | 0.95(0.66, 1.36)    |
| <b>Received IFA only from ANC contacts</b>                                                 |                     |                             |                     |
| No                                                                                         | 1616                | Ref                         | Ref                 |
| Yes                                                                                        | 956                 | 0.66(0.45-0.97)             | 0.30(0.20, 0.70)    |

IFA – iron and folic acid, ANC – antenatal care, GA – gestational age, \* variables not included in the adjusted model.
